# Supplementary material
Source: PubMed Central journal article supplement (PMC3530046)
Supplement: NIHMS421449-supplement-supptable.pdf [file NIHMS421449-supplement-supptable.pdf]

**Supplemental Table 1.** B-cells and CD27<sup>+</sup> memory B-cells are lower in patients treated with fludarabine ore with more than one line of chemotherapy.

|                                                                | <b>Fludarabine administration<br/>=YES<br/>(n=7)</b> | <b>Fludarabine administration<br/>=NO<br/>(n=17)</b> | <b>P value*</b> |
|----------------------------------------------------------------|------------------------------------------------------|------------------------------------------------------|-----------------|
| <b>CD19+ B-cells [n, cells/<math>\mu</math>l (IQR)]</b>        | 24 (16-130)                                          | 196 (91-296)                                         | <b>.019</b>     |
| <b>CD19+ B-cells [% (IQR)]</b>                                 | 2.0 (1.0-10.0)                                       | 13.0 (6.5-16.0)                                      | <b>.034</b>     |
| <b>CD27+ memory B-cells [n, cells/<math>\mu</math>l (IQR)]</b> | 3 (1-11)                                             | 8 (3-33)                                             | .13             |
| <b>CD27+ memory B-cells [% (IQR)]</b>                          | 0.2 (0.1-0.6)                                        | 0.6 (0.3-1.5)                                        | .19             |

|                                                                | <b>More than one line of<br/>chemotherapy=YES<br/>(n=4)</b> | <b>More than one line of<br/>chemotherapy= NO<br/>(n=20)</b> | <b>P value*</b> |
|----------------------------------------------------------------|-------------------------------------------------------------|--------------------------------------------------------------|-----------------|
| <b>CD19+ B-cells [n, cells/<math>\mu</math>l (IQR)]</b>        | 22 (3-104)                                                  | 189 (85-264)                                                 | <b>.029</b>     |
| <b>CD19+ B-cells [% (IQR)]</b>                                 | 1.5 (1.0-8.0)                                               | 12.0 (13.0-16.0)                                             | <b>.037</b>     |
| <b>CD27+ memory B-cells [n, cells/<math>\mu</math>l (IQR)]</b> | 1 (1-6)                                                     | 9 (3-23)                                                     | <b>.029</b>     |
| <b>CD27+ memory B-cells [% (IQR)]</b>                          | 0.1 (0.1-0.5)                                               | 0.6 (0.3-1.13)                                               | .06             |

**Notes**

*Abbreviations.* IQR, Interquartile range; % = % of cells in PBMCs.

\*P values are obtained by Mann-Whitney U test.
